# Supplementary material for: A Network Meta-Analysis on Randomized Trials Focusing on the Preventive Effect of Statins on Contrast-Induced Nephropathy
Source: Biomed Res Int. 2014 Sep 7;2014:213239. doi: 10.1155/2014/213239 (PMC4170696; doi:10.1155/2014/213239)
Supplement: Supplementary file 1 — The Supplementary Material includes complementary information for the pairwise and sensitivity analyses. [file 213239.f1.zip]

Archive with 11 entries (10 files):
- supplementary material/
- supplementary material/1048283.doc
- supplementary material/1048284.doc
- supplementary material/1048285.docx
- supplementary material/1048286.docx
- supplementary material/1048287.docx
- supplementary material/1048288.pdf
- supplementary material/1056707.pptx
- supplementary material/mat.213239.v1.doc
- supplementary material/mat.213239.v2.doc
- supplementary material/New folder1.docx
